# Supplementary material for: A indicator of visceral adipose dysfunction to evaluate metabolic health in adult Chinese
Source: PubMed Central journal article supplement (PMC5131270; doi:10.1038/srep38214), 2016-12-01
Supplement: srep38214-s1.pdf [file srep38214-s1.pdf]

# A indicator of visceral adipose dysfunction to evaluate metabolic health in adult Chinese

Ming-Feng Xia<sup>a,b\*</sup>, Ying Chen<sup>c\*</sup>, Huan-Dong Lin<sup>a,b</sup>, Hui Ma<sup>d</sup>, Xiao-Ming Li<sup>a,b</sup>, Qiqige Aleteng<sup>a,b</sup>,

Qian Li<sup>a,b</sup>, Dan Wang<sup>a,b</sup>, Yu Hu<sup>d</sup>, Bai-shen Pan<sup>e</sup>, Xue-Jun Li<sup>f</sup>, Xiao-Ying Li<sup>a,b§</sup>, Xin Gao<sup>a,b§</sup>

<sup>a</sup>Department of Endocrinology and Metabolism, Zhongshan Hospital, Fudan University, Shanghai, China

<sup>b</sup>Institute of Chronic Metabolic Diseases, Fudan University, Shanghai, China

<sup>c</sup>Department of Endocrinology and Metabolism, Affiliated Hospital of Nantong University, Nantong, Jiangsu, China.

<sup>d</sup>Department of Geriatrics, Zhongshan Hospital, Fudan University, Shanghai, China

<sup>e</sup>Department of Laboratory Medicine, Zhongshan Hospital, Fudan University, Shanghai, China

<sup>f</sup>Xiamen Diabetes Institute, Department of Endocrinology and Metabolism, The First Hospital of Xiamen, Xiamen University, 55 Zhenhai Road, Xiamen 361003, China.

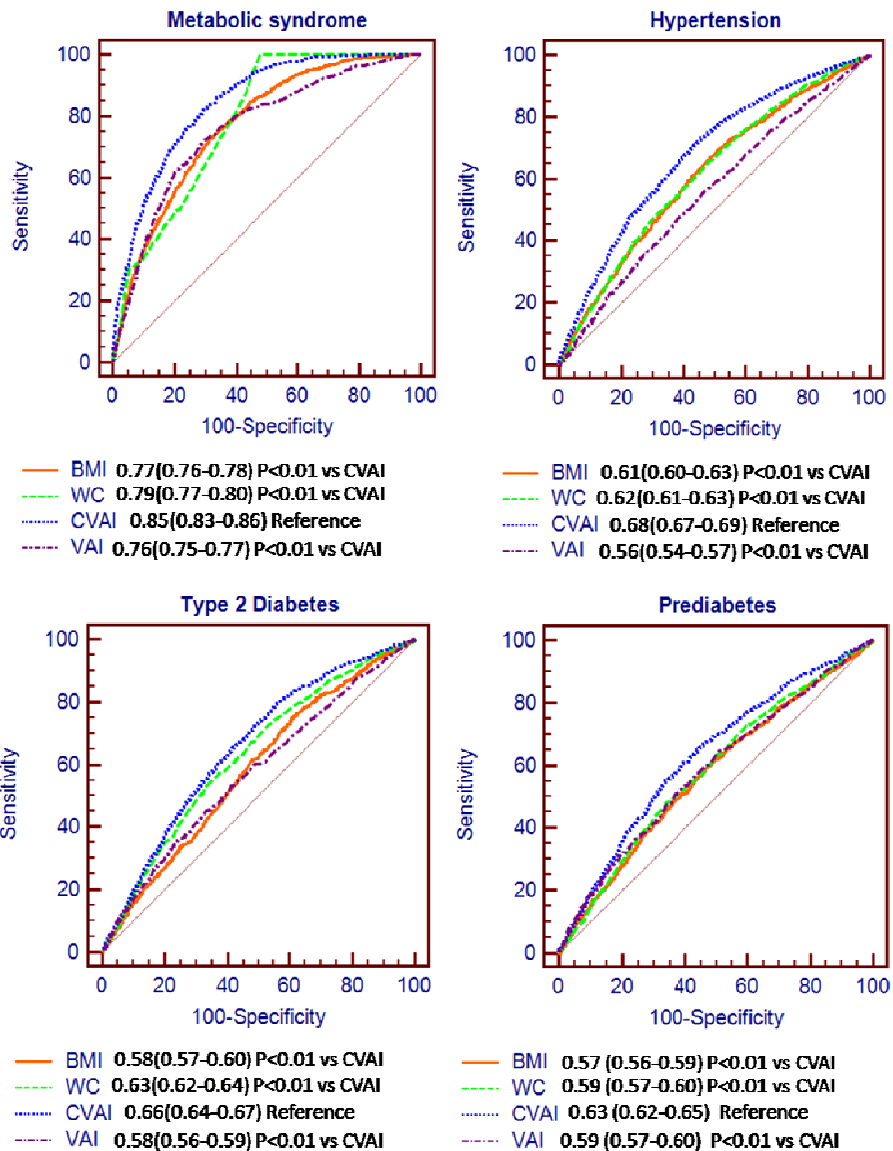

Supplementary Figure 1. ROC curves of CVAI, BMI, waist circumference to diagnose metabolic syndrome, hypertension, diabetes and prediabetes in the subgroup of Chinese with lower visceral adiposity (CVAI at Q1-Q3 range). AUROCs were 0.85(0.83-0.86), 0.68(0.67-0.69), 0.66(0.64-0.67) and 0.63(0.62-0.65) for diagnosis of metabolic syndrome, hypertension, diabetes and prediabetes, significantly better than BMI, waist circumference and VAI established in Italians (All  $P < 0.001$ ).
